# Supplementary material
Source: PubMed Central journal article supplement (PMC3758459)
Supplement: NIHMS442479-supplement-02.pdf [file NIHMS442479-supplement-02.pdf]

1  
2  
3  
4 **Multicenter Uveitis Steroid Treatment (MUST) Trial Credit Roster**  
5

6 **Participating Clinical Centers**  
7

8  
9 **Duke Eye Center**, Durham, NC: Glenn J. Jaffe, MD (Director); Brenda Branchaud, COT; Paul Hahn, MD,  
10 PhD; Larry Koreen, MD, PhD, MPH; Eleonora (Nora) M. Lad; Phoebe Lin; Joseph Nissim Martel; Neha  
11 (Shah) Serrano, MD; Cindy Skalak, RN, COT; Lejla Vajzovic, MD. Former Members: Claxton Baer, MD;  
12 Joyce Bryant, COT; Sai Chavala, MD; Michael Cusick, MD; Shelley Day, MD; Pouya Dayani, MD; Justis  
13 Ehlers, MD; Muge Kesen, MD; Annie Lee, MD; Alex Melamud, MD; Jawad A. Qureshi, MD; Adrienne  
14 Williams Scott; Robert F. See, MD; Robert K. Shuler, MD; Megan Wood, MS, COA.  
15  
16

17 **Emory University**, Atlanta, GA: Steven Yeh, MD (Director); Alcides Fernandes, MD; Deborah Gibbs,  
18 COMT, CCRC; Donna Leef, COMT. Former Members: Daniel F. Martin, MD; Sunil Srivastava, MD.  
19  
20

21 **Johns Hopkins University**, Baltimore, MD: James P. Dunn, MD (Director); Ellen Arnold, BS; Patricia M.  
22 Barnabie, BS; Jeff Boring, COA; Diane M. Brown, MSN, RN; Bryn Burkholder, MD; Theresa Gan, MD;  
23 Alison G. Livingston, BSN, RN; Terry Reed, COA. Former Members: Marie-Lynn Belair, MD; Stephen G.  
24 Bolton, CRNP; Joseph B. Brodine; Lisa M. Brune, BSN, RN; Anat Galor, MD; Adam Jacobowitz, MD; Meera  
25 Kapoor; Sanjay Kedhar, MD; Stephen Kim, MD; Henry A. Leder, MD; Yavette Morton; Kisten Nolan, BSN,  
26 MPH, RN; George B. Peters, MD, MBA; Priscilla Soto; Ricardo Stevenson, MD; Michelle Tarver-Carr, MD,  
27 PhD; Yue Wang, MD, PhD.  
28  
29

30 **Massachusetts Eye Research and Surgery Institute**, Cambridge, MA: C. Stephen Foster, MD (Director);  
31 Linda Bruner; David M. Hinkle, MD; Jyothir Johnson; Danielle Marvell; Sana S. Siddique. Former  
32 Members: Sarah Acevedo, MD; Fahd Anzaar, MD; Tom Cesca; Angelica Contero; Kayleigh Fitzpatrick;  
33 Karina Q. Lebron, MD; Chandra Morgan; Nita Patel, MSW; Jennifer Pinto; Janet Sprague; Taygan Yilmaz.  
34  
35

36 **National Eye Institute**, Bethesda, MD: H. Nida Sen, MD, MHSc (Director); Michael Bono; Denise  
37 Cunningham, CRA; Darryl Hayes, COA; Dessie Koutsandreas, BS, COA; Robert B. Nussenblatt, MD; Patti R.  
38 Sherry, BSN; Gregory L. Short, COMT; Wendy Smith, MD; Alana Temple, BSN. Former Members: Allison  
39 Bamji, RN; Hanna Coleman, MD; Geetantiali Davuluri, MD; Lisa Faia, MD; Chloe Gottlieb, MD; Guy V.  
40 Jirawuthiworavong, MD; Julie C. Lew, MD; Richard Mercer, COT; Dominic Obiyor, BSN; Cheryl H. Perry,  
41 BSN; Natalia Potapova, MD; Eric Weichel, MD; Keith J. Wroblewski, MD; Steven Yeh, MD.  
42  
43

44 **New York Eye & Ear Infirmary**, New York, NY: Paul A. Laskany, MD (Director); Jason Badamo; Jenny  
45 Gallardo; Monica Lorenzo-Laskany, MD; Robert Masini; Susan Morell; Ann Nour; Meredith Sanchez;  
46 Former Members: Kenneth M. Boyd; Jacek Jarczyński; Mirjana McGrosky; Kate Steinberg.  
47  
48

49 **Royal Victorian Eye & Ear Hospital**, East Melbourne, Australia: Richard J. Stawell, MD (Director); Lisa  
50 Breayley; Carly D'Sylva; Elizabeth Glatz; Lauren Hodgson; Ignatios Koukouras; Lyndell Lim, MD; Cecilia  
51 Ling, MD; Rachel McIntosh; Julie Morrison (Ewing); Andrew Newton; Richard Smallwood; Ehud Zamir,  
52 MD. Former Members: Nicola Hunt; Lisa Jones; Suzanne Williams.  
53  
54

55 **Rush University Medical Center**, Chicago, IL: Pauline T. Merrill, MD (Director); Pam Hulvey; Denise L.  
56 Voskuil-Marre, BS. Former Members: Bruce Gaynes; Christina Giannoulis; Elaine Kernbauer; Heena S.  
57 Khan, BA; Sarah J. Levine; Scott Toennesen.  
58  
59  
60  
61  
62  
63  
64  
65

1  
2  
3  
4 **Texas Retina Associates**, Dallas, TX: Robert C. Wang, MD (Director); Hank Aguado; Sally Arceneaux;  
5 Gary E. Fish, MD; Nick Hesse; Diana Jaramillo; Michael Mackens; Karin Mutz; Brenda Sanchez. Former  
6 Members: Jean Arnwine; David Callanan, MD; Kimberly Cummings; Keith Gray; Susie Howden.  
7

8  
9 **United Kingdom Institute of Ophthalmology**, London, UK: Susan Lightman, MD, PhD (Director); Asat  
10 Bar; Jiten Moraji; Ashley Prytherch; Simon Taylor, MD; Oren Tomkins. Former Members: Kate Edwards;  
11 Lavanish Joshi; Timothy Stubbs; Hamish Towler; Rebecca Tronnberg.  
12

13  
14 **University of California at Los Angeles**, Los Angeles, CA: Gary N. Holland, MD (Director); Robert D.  
15 Almanzor, COA; Jose Castellanos, COT; Jean Pierre Hubschman, MD; Ann K. Johiro, NP; Partho S. Kalyani,  
16 MD; Ralph D. Levinson, MD; Susan S. Ransome, MD. Former Members: Christine R. Gonzales, MD;  
17 Anurag Gupta, MD; Michael A. Kapamajian, MD; Peter J. Kappel, MD.  
18

19  
20 **University of California at San Diego**, San Diego, CA: William R. Freeman, MD (Director); Igor Kozak,  
21 MD; Vivian Nguyen; Debbie Powell, BBA. Former Members: Tom Clark, BSc, CRA; Denine E. Cochran,  
22 COT, CCRC, Joshua Hedaya, MD; Tiara Kemper; Jacqueline M. LeMoine; Megan E. Loughran, BA;  
23 Luzandra Magana; Francesca Mojana, MD; Victoria Morrison, MD; Stephen F. Oster, MD.  
24

25  
26 **University of California at San Francisco**, San Francisco, CA: Nisha Acharya, MD (Director); David Clay;  
27 Salena Lee, OD; Mary Lew, BA; Todd P. Margolis, MD; Jay Stewart, MD; Ira G. Wong, MD. Former  
28 Members: Debra Brown; Claire M. Khouri, BA.  
29

30  
31 **University of Illinois at Chicago**, Chicago, IL: Debra A. Goldstein, MD (Director); Anna L. Castro-Malek.  
32 Former Members: Catherine E. Croke; Melody Huntley; Marcia Niec; Dimitry Pyatetsky, MD; Misel  
33 Ramirez; Howard H. Tessler, MD.  
34

35  
36 **University of Miami**, Miami, FL: Janet L. Davis, MD (Director); Thomas A. Albini, MD; Marie Chin.  
37 Former Members: Daniela Castaño; Ariana Elizondo, BS, CCRP; Macy Ho; Jaclyn L. Kovach, MD; Richard  
38 C-S Lin, MD; Efrem Mandelcorn; Jackie K-D Nguyen, MD; Aura Pacini; Susan Pineda; David A. Pinto; Jose  
39 Rebimbas; Kimberly E. Stepien, MD; Claudia Teran.  
40

41  
42 **University of Michigan**, Ann Arbor, MI: Susan G. Elner, MD (Director); Linda Fournier, COA; Richard  
43 Hackel; Moella Hesselgrave, COA; Robert Prusak; Stephen J. Saxe, MD; Pamela Titus, COT. Former  
44 Members: Melissa Bergeron, COA; Reneé Blosser, COMT; Rebecca Brown, COA; Carrie Chrisman-  
45 McClure; Julie R. Gothrup, COA; Deanna Sizemore, COA.  
46

47  
48 **University of Pennsylvania**, Philadelphia, PA: John H. Kempen, MD, PhD (Director); James Berger; Sheri  
49 Drossner; Joan C. DuPont; Jonathan Lo; Albert M. Maguire, MD; Janice Petner; Rebecca Salvo; Laurel  
50 Weeney; Elizabeth Windsor. Former Members: Tim Hopkins, MD; Dawn McCall; Monique McRay;  
51 Daniel Will, MD; Wei Xu.  
52

53  
54 **University of South Florida**, Tampa, FL: Peter R. Pavan, MD (Director); JoAnn Leto; Brian Madow, MD;  
55 Lori Mayor; Scott E. Pautler, MD; Wyatt Saxon; Judy Soto. Former Members: Burton Goldstein, MD;  
56 Amy Klukoff; Lucy Lombright; Kim McDonald; Maria Ortiz; Susan Scymanky; Dee Dee Szalay.  
57

58  
59 **University of Southern California**, Los Angeles, CA: Narsing Rao, MD (Director); Tamara Davis; Jackie  
60 Douglass; Judith Linton; Margaret Padilla, CCRP; Sylvia Ramos; Narsing A. Rao, MD. Former Members:  
61  
62  
63  
64  
65

Alexia Aguirre; Lawrence Chong, MD; Lupe Cisneros, COA; Elizabeth Corona; Dean Elliott, MD; Amani Fawzi, MD; Jesse Garcia; Rahul Khurana, MD; Jennifer Lim, MD; Rachel Mead; Julie H. Tsai, MD.

**University of Utah**, Salt Lake City, UT: Albert Vitale, MD (Director); Paul S. Bernstein, MD, PhD; Bonnie Carlstrom, COA; James Gilman, CRA; Sandra Hanseen, COA; Paula Morris, CRA; Diana Ramirez; Kimberley Wegner, BS, CRC.

**Virginia Eye Consultants**, Norfolk, VA: John D. Sheppard, MD, MMSc (Director); Brianne Anthony; Amber Casper; Lisa Felix-Kent, COA; Jeanette Fernandez, COMT; Stephen V. Scoper, MD. Former Members: R. Denise Cole; Nancy Crawford; Lisa Franklin; Krista Hamelin; Jen Martin; Rebecca Marx; Gregory Schultz, DD; Joseph Webb, BS; Pamela Yeager.

**Vitreoretinal Consultants**, Houston, TX: Rosa Y. Kim, MD (Director); Matthew S. Benz, MD; David M. Brown, MD; Eric Chen, MD; Richard H. Fish, MD; Shayla Friday (Hay); James Major, Jr., MD, PhD; Laura Shawver; Tien P. Wong, MD. Former Members: Rebecca De La Garza; Karin Mutz.

**Washington University**, St. Louis, MO: P. Kumar Rao, MD (Director); Eve Adcock; Rajendra S. Apte, MD, PhD; Amy Baladenski; Rhonda Curtis; Sarah Gould; Amanda Hebden; Jamie Kambarian; Charla Meyer; Sam Pistorius; Melanie Quinn; Greg Rathert. Former Members: Kevin J. Blinder, MD; Ashley Hartz; Pam Light; Gaurav K. Shah, MD; Russell VanGelder, MD, PhD.

## Committees

**Executive Committee:** Douglas A. Jabs, MD, MBA (Chair); Michael M. Altaweel, MD; Janet T. Holbrook, PhD, MPH; John H. Kempen, MD, PhD; Natalie Kurinij, PhD.

**Steering Committee:** Douglas A. Jabs, MD, MBA (Chair); Robert D. Almanzor, COA; Michael M. Altaweel; Diane Brown; James P. Dunn, MD; Janet T. Holbrook, PhD, MPH; Gary N. Holland, MD; John H. Kempen, MD, PhD; Rosa Y. Kim, MD; Natalie Kurinij, PhD; Nancy Prusakowski, MS; Jennifer E. Thorne, MD, PhD. Former Members: Stephen G. Bolton, RN, BSN; Lisa M. Brune, RN, BSN; Tom Clark, CRA; James Gilman; Larry Hubbard, MAT; Daniel F. Martin, MD; Robert B. Nussenblatt, MD.

**Data, Safety and Monitoring Committee:** Voting members: Janet Wittes, PhD (Chair); William E. Barlow, PhD; Marc Hochberg, MD; Alice T. Lyon, MD; Alan G. Palestine, MD; Lee S. Simon, MD. Non-voting members: Michael M. Altaweel, MD; Janet T. Holbrook, PhD, MPH; Douglas A. Jabs, MD, MBA; Natalie Kurinij, PhD. Former Members: James T. Rosenbaum, MD; Harmon Smith, PhD.

**Surgical Quality Assurance Committee:** John H. Kempen, MD, PhD (Chair); James P. Dunn, MD; Glenn J. Jaffe, MD. Former Members: Daniel F. Martin, MD.

**Medical Therapy Quality Assurance Committee:** Jennifer E. Thorne, MD, PhD (Chair); Nisha R. Acharya, MD, MS; Douglas A. Jabs, MD, MBA; John H. Kempen, MD, PhD; Paul A. Laskany, MD; Robert B. Nussenblatt, MD, MPH; Albert T. Vitale, MD. Former Members: Russell VanGelder, MD, PhD.

**Visual Function Quality Assurance Committee:** Robert D. Almanzor, COA (Chair); Judith Alexander, BA, CCRP; Jeffrey A. Boring, COA; Deborah Gibbs, COMT, CCRC; Salena Lee, OD, FAAO; Jennifer E. Thorne, MD, PhD (Advisor). Former Members: Wai Ping Ng, BS.

1  
2  
3  
4 **Glaucoma Committee:** David S. Friedman, MD (Chair); Anna Adler, MS; Judith Alexander, BA, CCRP;  
5 Alyce Burke, MPH; Janet T. Holbrook, PhD, MPH; Joanne Katz, ScD; John H. Kempen, MD, PhD; Nancy  
6 Prusakowski, MS; Susan Reed, BS; Jennifer E. Thorne, MD, PhD; Husam Ansari, MD, PhD (consultant).  
7 Former Members: Nicholas Cohen, MS; Sanjukta Modak, MS; Wai Ping Ng, BS.  
8

9  
10 **Statistical Analysis Committee:** Elizabeth A. Sugar, PhD (Chair); Lea T. Drye, PhD; Kevin Frick, PhD; Janet  
11 T. Holbrook, PhD, MPH; JoAnn Katz, ScD; Thomas A. Louis, PhD; Mark L. Van Natta, MHS. Former  
12 Members: Sanjukta Modak, MS; David Shade, JD.  
13  
14

## 15 **Resource Centers**

### 16 **Chairman's Office:**

17  
18 **Mount Sinai School of Medicine**, New York, NY: Douglas A. Jabs, MD, MBA (Study Chairman);  
19 Yasmin Hilal, MHS; Melissa A. Nieves, BA; Karen Pascual, MBA; Jill S. Slutsky-Sanon, MPA. Former  
20 Members: Colby Glomp; Maria Stevens, CM.  
21  
22

23  
24 **University of Pennsylvania**, Philadelphia, PA: John H. Kempen, MD, PhD (Study Vice-Chairman).  
25  
26

### 27 **Coordinating Center:**

28 **Johns Hopkins University Bloomberg School of Public Health**, Baltimore, MD: Janet T. Holbrook,  
29 PhD, MPH (Director); Anna L. Adler, MS; Judith Alexander, BA; Jeff A. Boring, COA; Alyce E. Burke, MPH;  
30 Karen Collins; John D. Dodge; Lea T. Drye, PhD; Cathleen S. Ewing; Kevin D. Frick, PhD; David S.  
31 Friedman, MD, PhD; Rosetta Jackson; Joanne Katz, ScD; Andrea T. Lears, BS; Hope Livingston; Thomas A.  
32 Louis, PhD; Curtis L. Meinert, PhD; Jill L. Meinert; Vinnette Morrison, BS; Deborah J. Nowakowski; Nancy  
33 Prusakowski, MS; Dave M. Shade, JD; Rochelle E. Smith, BS; Karen Steuernagle; Elizabeth A. Sugar, PhD;  
34 Jennifer E. Thorne, MD, PhD; James A. Tonascia, PhD; Mark L. Van Natta, MHS; Richard Zheng, MS.  
35 Former Members: Paul Chen; Nicholas Cohen, MS; Sanjukta Modak, MS; Wai Ping Ng, BS; Weijiang Shen,  
36 MS; Charles Shiflett, BS; Ada Tieman, MBA.  
37  
38

### 39 **Reading Center:**

40 **University of Wisconsin Fundus Photograph Reading Center**, Madison, WI: Michael M.  
41 Altaweel, MD (Director); Wendy K. Benz, PhD; Geoffrey Chambers, MS; Debra J. Christianson, BS; Amitha  
42 Domalpally, MD; Jacquelyn Freund, MS; Sapna Gangaputra, MD, MPH; Kathleen E. Glander, BBA; Anne  
43 Goulding, BA; Jeffrey M. Joyce, MS; Christina N. Kruse, BA; Dawn J. Myers, BS; Susan Reed, BS; James L.  
44 Reimers, BA; Amy Remm, BS; Ruth A. Shaw, BS; Dennis Thayer; Erika Treichel, DVM; Kelly J. Warren, RN,  
45 BS, MSES; Sheila M. Watson, BS, DVM; James K. White, BME; Tara Wilhelmson, BS; Grace Zhang, BA.  
46 Former Members: Margaret A. Fleischli, AB, DVM; Vonnie Gama; Dennis Hafford; Susan E. Harris, MS;  
47 Larry D. Hubbard, MAT; Kristine A. Johnson; Lauren Nagle; Gwyn E. Padden-Lechten, BS; Alyson  
48 Pohlman, BA; Peggy Sivesind; Mary K. Webster, BS.  
49  
50  
51  
52

53 **National Eye Institute**, Bethesda, MD: Natalie Kurinij, PhD.  
54  
55  
56  
57  
58  
59  
60  
61  
62  
63  
64  
65
